# Supplementary material for: Enhancement of the liver’s neuroprotective role ameliorates traumatic brain injury pathology
Source: PubMed Central journal article supplement — Proc Natl Acad Sci U S A. 2023 Jun 20;120(26):e2301360120. doi: 10.1073/pnas.2301360120 (PMC10293829; doi:10.1073/pnas.2301360120), 2023-06-20

**Figure1C. sEH protein in the liver after CCI**

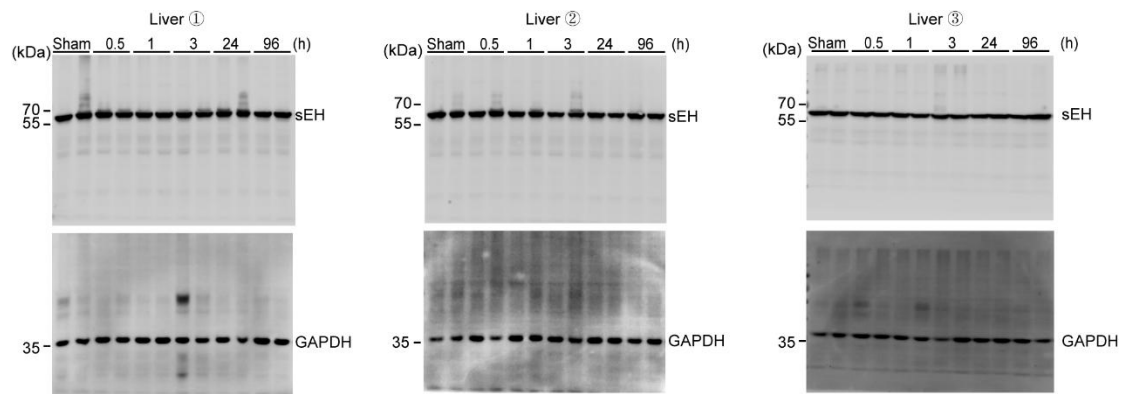

**Figure1D. sEH protein in the brain after CCI**

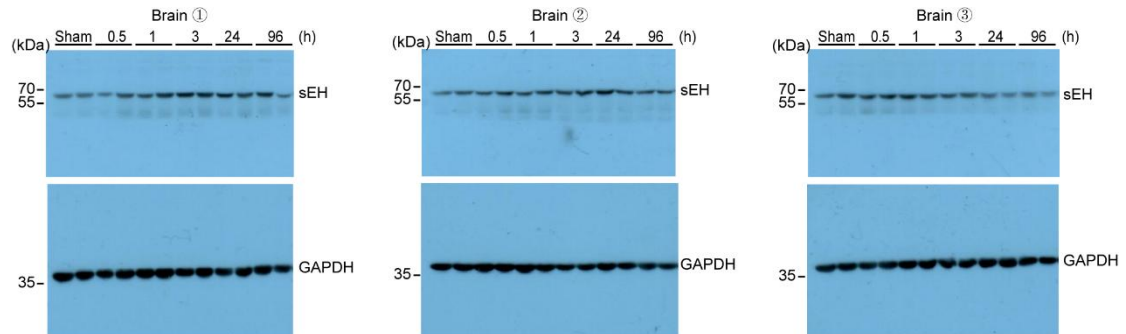

**Figure1F. sEH protein after CHI  
Liver**

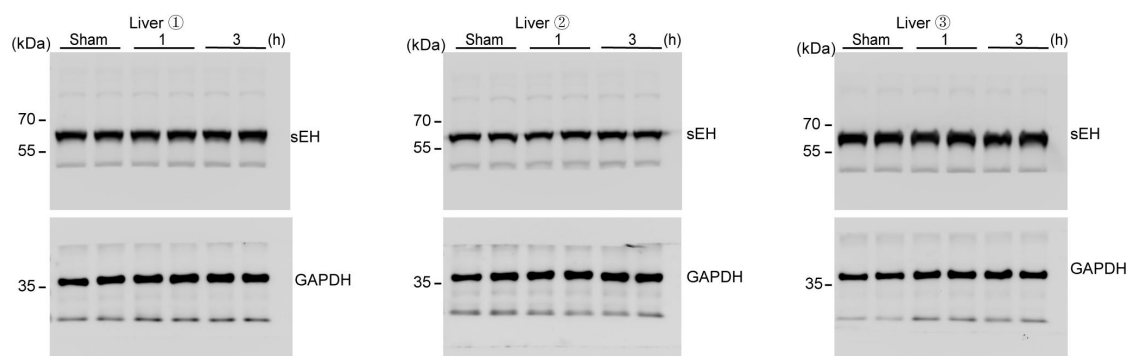

**Brian**

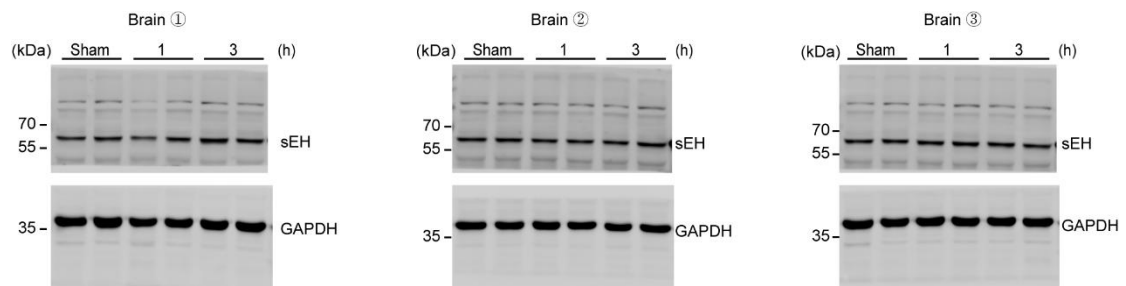

**Figure3I and S2G. MMP-9 protein in WT/cKO mice after CCI**

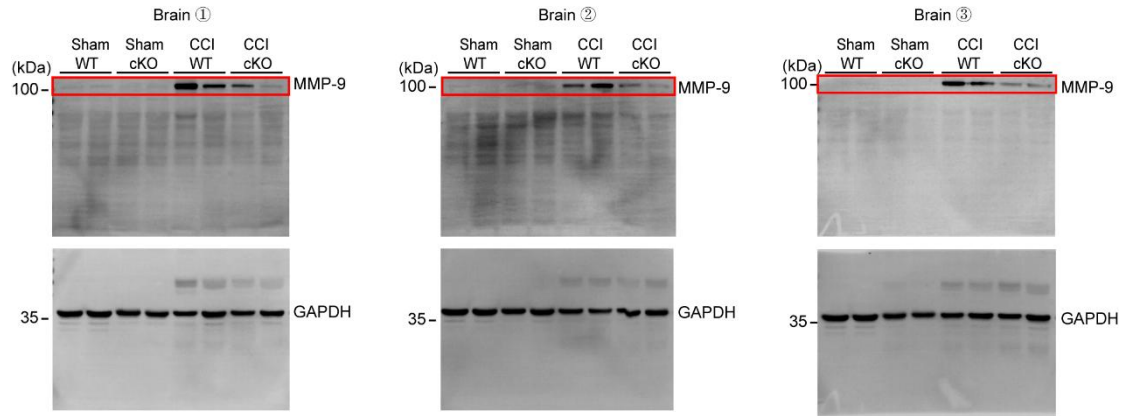

**Figure3L and S2G. BDNF protein in WT/cKO mice after CCI**

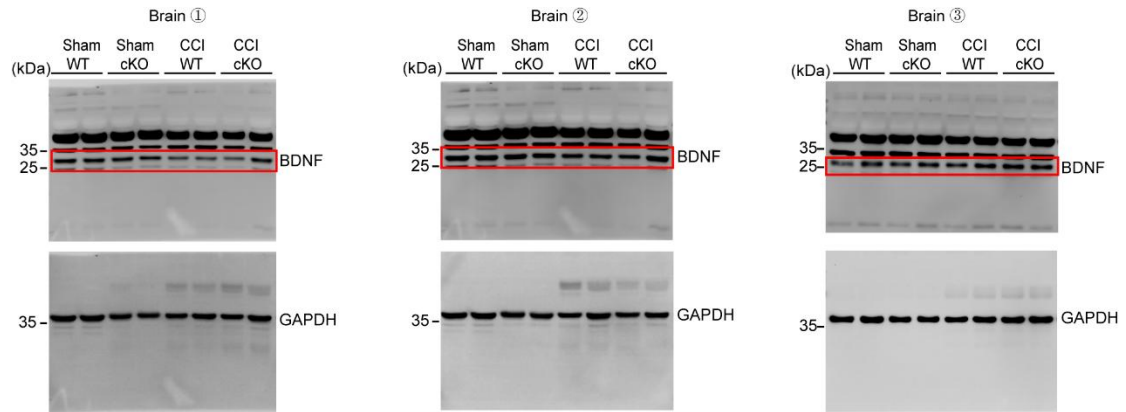

**Figure 5F and S6C. MMP-9 protein in mice treated with ACSF/14,15-EET after CCI**

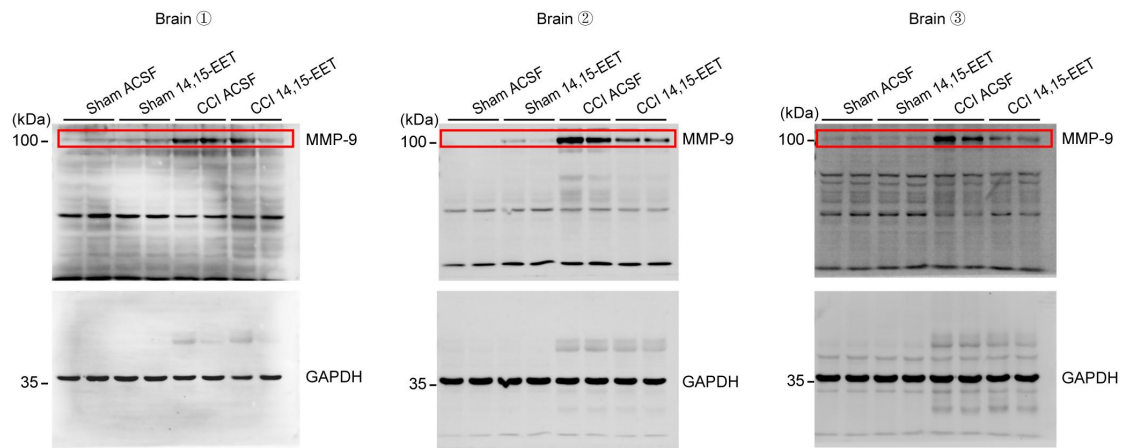

**Figure 5L and S6C. BDNF protein in mice treated with ACSF/14,15-EET after CCI**

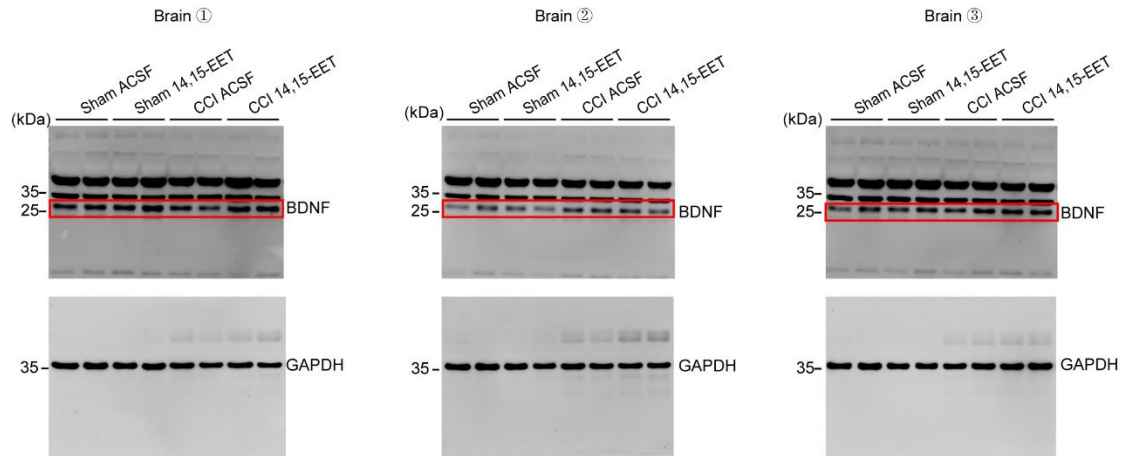

**FigureS1B. sEH protein in mice injected with rAAV2/8-SC-shRNA/*Ephx2*-shRNA**

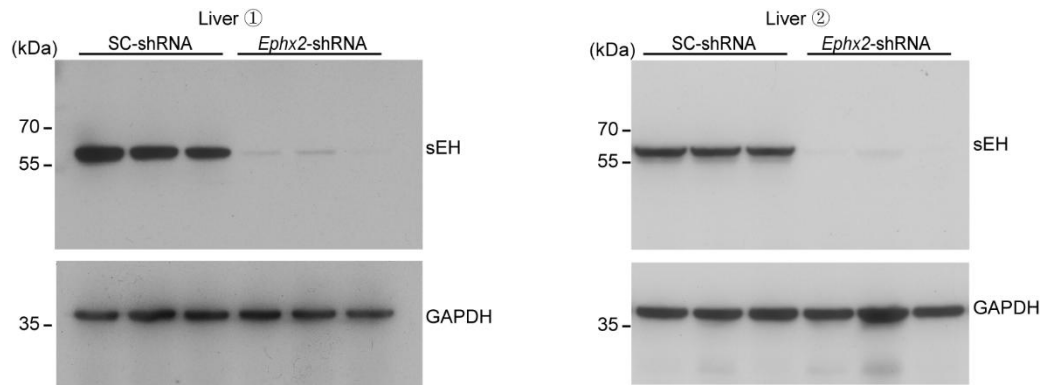

**FigureS1G. sEH protein in mice injected with rAAV2/8-eYFP/*Ephx2***

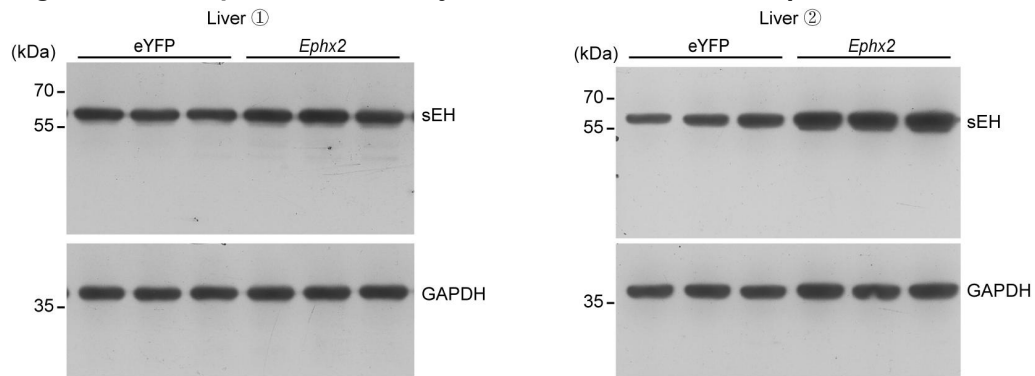

**FigureS2A. sEH protein in WT/cKO mice**

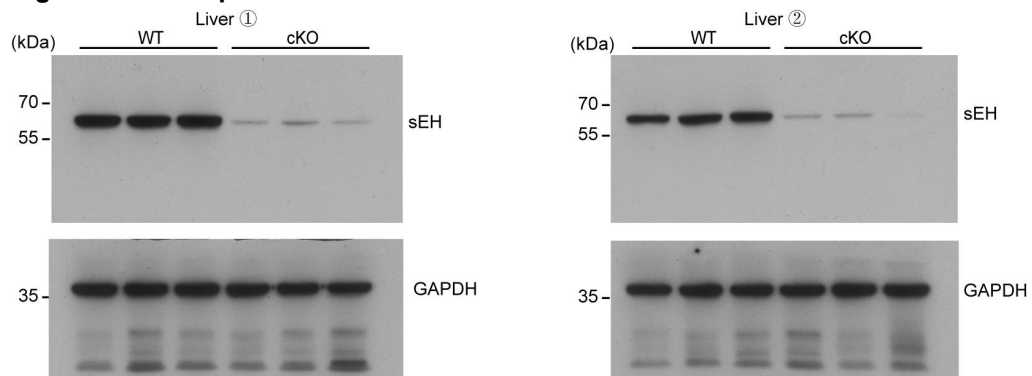

Supplement: pnas.2301360120.sd01.pdf [file pnas.2301360120.sd01.pdf]
